# Supplementary material for: Preparation of sulfur-doped porous carbon from polyphenylene sulfide waste for photothermal conversion materials to achieve solar-driven water evaporation
Source: Royal Society of Chemistry journal article supplement (doi:10.1039/d4nr04006f), 2025-01-01
Supplement: d4nr04006f1.pdf [file d4nr04006f1.pdf]

# **Preparation of sulfur-doped porous carbon from polyphenylene sulfide waste for photothermal conversion materials to achieve solar-driven water evaporation**

Xuejing Wei <sup>a</sup>, Zixuan Zou <sup>a</sup>, Jiayi Yao <sup>a</sup>, Li Sun <sup>a</sup>, Yinxing Xu <sup>a</sup>, Lufeng Zhang <sup>a</sup>, Shaohua Chen <sup>a,\*</sup>, Yuhao Liu <sup>a,\*</sup>, Jiayue Chen <sup>a,\*</sup>

<sup>a</sup> College of Materials Science and Engineering, Hubei Provincial Engineering

Research Center of Industrial Fiber Preparation and Application, Wuhan Textile

University, Wuhan 430200, Hubei, China.

Sichuan Silk Engineering Technology Center, Sichuan Academy of Silk Sciences Co., Ltd.,

Chengdu 610031, Sichuan, China.

\* Corresponding authors.

Corresponding authors: Shaohua Chen <sup>a,\*</sup>, Yuhao Liu <sup>a,\*</sup>, Jiayue Chen <sup>a,\*</sup>

Email: shaohuachen@foxmail.com, liuyuhao951016@163.com, cjiy9480@139.com

## Peak Analysis

Data set: [Book2]Sheet1!B

Date:2024/12/25

Base Line: Constant

Ch<sup>2</sup> =1.57732E+02

Adj. R-Square=9.63642E-01

# of Data Points =2746

SS=4.32184E+05

Degree of Freedom =2740

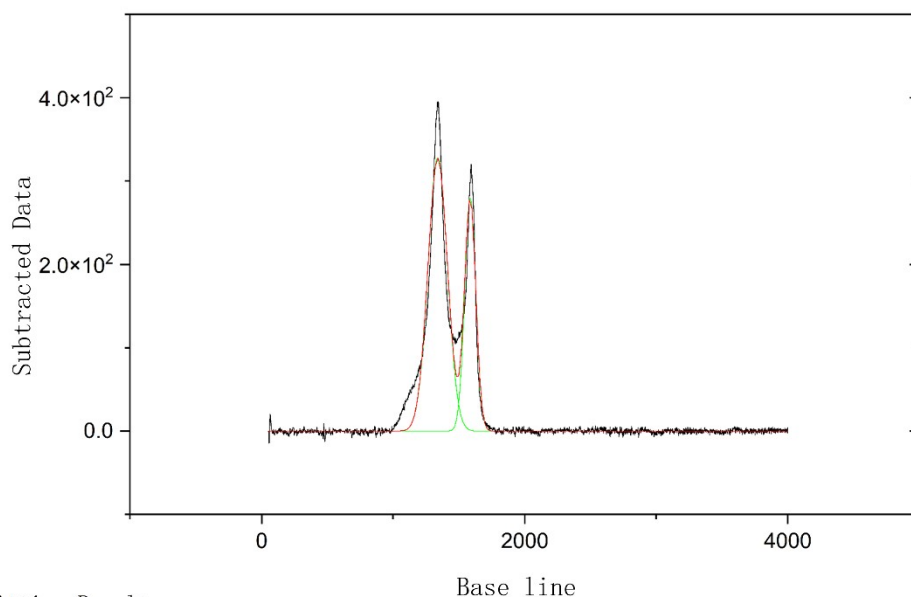

Fitting Results

| Peak Index | Peak Type | Area Int g  | FWHM      | Max Height | Center Gr v ty | Area Int g p |
|------------|-----------|-------------|-----------|------------|----------------|--------------|
| 1          | Gaussian  | 60649.60147 | 173.95299 | 327.53963  | 1338.76983     | 67.1277      |
| 2          | Gaussian  | 29699.98313 | 99.9096   | 279.26518  | 1585.71671     | 32.8723      |

**Figure S1.** Basic data information of the fitted peaks.

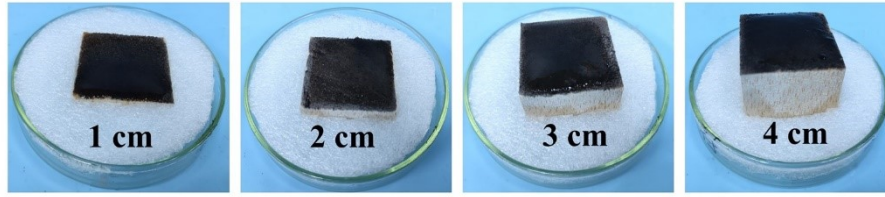

**Figure S2.** Digital images of 1 cm 、 2 cm 、 3 cm 、 4 cm CP-Wood evaporators during solar photothermal seawater evaporation under 1 sun radiation.

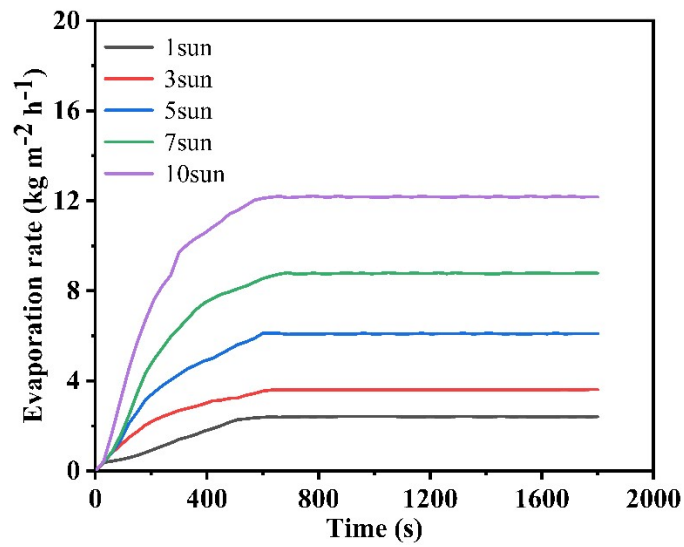

**Fig S3.** Evaporation rates of the KCP-Wood evaporator at different irradiation intensities.

**Table S1.:** Evaporation rates of the KCP-Wood evaporator at different irradiation intensities.

| Time (s) | Evaporation rate (kg m <sup>-2</sup> h <sup>-1</sup> ) |       |       |       |       |
|----------|--------------------------------------------------------|-------|-------|-------|-------|
| 0        | 0                                                      | 0     | 0     | 0     | 0     |
| 30       | 0.381                                                  | 0.391 | 0.401 | 0.407 | 0.431 |
| 60       | 0.433                                                  | 0.811 | 0.821 | 0.851 | 1.702 |
| 90       | 0.501                                                  | 1.132 | 1.334 | 1.554 | 3.112 |
| 120      | 0.581                                                  | 1.485 | 2.101 | 2.453 | 4.515 |
| 150      | 0.693                                                  | 1.741 | 2.607 | 3.454 | 5.706 |
| 180      | 0.822                                                  | 2.041 | 3.167 | 4.352 | 6.711 |
| 210      | 0.963                                                  | 2.244 | 3.484 | 4.952 | 7.606 |
| 240      | 1.101                                                  | 2.412 | 3.783 | 5.451 | 8.210 |
| 270      | 1.241                                                  | 2.544 | 4.043 | 5.956 | 8.684 |
| 300      | 1.401                                                  | 2.691 | 4.285 | 6.351 | 9.704 |

|      |       |       |       |       |        |
|------|-------|-------|-------|-------|--------|
| 330  | 1.503 | 2.781 | 4.533 | 6.754 | 10.055 |
| 360  | 1.621 | 2.872 | 4.708 | 7.151 | 10.335 |
| 390  | 1.771 | 2.984 | 4.882 | 7.453 | 10.543 |
| 420  | 1.881 | 3.112 | 5.001 | 7.655 | 10.826 |
| 450  | 2.011 | 3.142 | 5.201 | 7.842 | 11.083 |
| 480  | 2.163 | 3.223 | 5.403 | 7.953 | 11.410 |
| 510  | 2.281 | 3.240 | 5.611 | 8.093 | 11.573 |
| 540  | 2.314 | 3.360 | 5.732 | 8.209 | 11.796 |
| 570  | 2.361 | 3.441 | 5.891 | 8.380 | 12.024 |
| 600  | 2.381 | 3.550 | 6.111 | 8.543 | 12.112 |
| 630  | 2.403 | 3.591 | 6.110 | 8.653 | 12.162 |
| 660  | 2.391 | 3.610 | 6.111 | 8.746 | 12.204 |
| 690  | 2.401 | 3.612 | 6.067 | 8.807 | 12.133 |
| 720  | 2.411 | 3.601 | 6.076 | 8.736 | 12.168 |
| 750  | 2.415 | 3.606 | 6.076 | 8.752 | 12.181 |
| 780  | 2.410 | 3.608 | 6.081 | 8.791 | 12.210 |
| 810  | 2.415 | 3.601 | 6.083 | 8.761 | 12.171 |
| 840  | 2.413 | 3.604 | 6.101 | 8.763 | 12.154 |
| 870  | 2.415 | 3.592 | 6.085 | 8.774 | 12.213 |
| 900  | 2.416 | 3.610 | 6.090 | 8.801 | 12.163 |
| 930  | 2.414 | 3.611 | 6.081 | 8.772 | 12.172 |
| 960  | 2.416 | 3.593 | 6.120 | 8.786 | 12.179 |
| 990  | 2.415 | 3.612 | 6.092 | 8.763 | 12.167 |
| 1020 | 2.414 | 3.613 | 6.089 | 8.770 | 12.151 |
| 1050 | 2.415 | 3.612 | 6.105 | 8.808 | 12.169 |
| 1080 | 2.414 | 3.604 | 6.092 | 8.776 | 12.200 |
| 1110 | 2.413 | 3.601 | 6.089 | 8.765 | 12.173 |
| 1140 | 2.413 | 3.611 | 6.096 | 8.787 | 12.167 |
| 1170 | 2.412 | 3.601 | 6.114 | 8.770 | 12.201 |
| 1200 | 2.414 | 3.610 | 6.091 | 8.769 | 12.173 |
| 1230 | 2.413 | 3.599 | 6.095 | 8.805 | 12.174 |
| 1260 | 2.413 | 3.603 | 6.093 | 8.762 | 12.154 |
| 1290 | 2.414 | 3.602 | 6.101 | 8.807 | 12.160 |
| 1320 | 2.415 | 3.611 | 6.110 | 8.770 | 12.201 |
| 1350 | 2.415 | 3.612 | 6.092 | 8.772 | 12.173 |
| 1380 | 2.413 | 3.604 | 6.095 | 8.769 | 12.187 |
| 1410 | 2.413 | 3.601 | 6.115 | 8.763 | 12.157 |
| 1440 | 2.415 | 3.604 | 6.093 | 8.746 | 12.205 |
| 1470 | 2.414 | 3.606 | 6.088 | 8.799 | 12.171 |
| 1500 | 2.413 | 3.610 | 6.093 | 8.773 | 12.164 |
| 1530 | 2.414 | 3.608 | 6.085 | 8.764 | 12.173 |
| 1560 | 2.412 | 3.611 | 6.090 | 8.797 | 12.211 |
| 1590 | 2.412 | 3.608 | 6.109 | 8.781 | 12.172 |

|      |       |       |       |       |        |
|------|-------|-------|-------|-------|--------|
| 1620 | 2.413 | 3.611 | 6.092 | 8.785 | 12.169 |
| 1650 | 2.412 | 3.613 | 6.119 | 8.765 | 12.202 |
| 1680 | 2.414 | 3.615 | 6.091 | 8.773 | 12.175 |
| 1710 | 2.413 | 3.613 | 6.095 | 8.768 | 12.193 |
| 1740 | 2.414 | 3.612 | 6.095 | 8.801 | 12.170 |
| 1770 | 2.413 | 3.615 | 6.098 | 8.778 | 12.173 |
| 1800 | 2.415 | 3.615 | 6.098 | 8.777 | 12.173 |
